# Supplementary material for: Activation of a CNXylyl ancillary ligand in the reaction of electron-deficient alkynes with a phosphido niobocene complex
Source: Royal Society of Chemistry journal article supplement (doi:10.1039/b517307h), 2006-01-01
Supplement: b517307h.pdf [file b517307h.pdf]

### Synthesis of 2

[Nb( $\eta^5$ -C<sub>5</sub>H<sub>4</sub>SiMe<sub>3</sub>)<sub>2</sub>(CNXylyl)(PPh<sub>2</sub>)]Cl (**1**) (0.62 g, 0.87 mmol) in toluene (30 mL) was treated with 0.5 M aqueous NaOH (1.72 mL, 10% excess). The mixture was vigorously stirred. Within 4 h the precipitate had dissolved and the organic phase turned dark brown. The toluene solution was filtered and evaporated to dryness. Complex **2** was obtained as a yellow-brown oily material.

(**2**) Yield = 80%. IR (Nujol):  $\nu$  (cm<sup>-1</sup>) 1990 (C≡N). <sup>1</sup>H NMR (500 MHz, C<sub>6</sub>D<sub>6</sub>):  $\delta$  0.08 (s, 18 H, SiMe<sub>3</sub>), 2.05 (s, 6 H, CH<sub>3</sub>, CNXylyl), 4.58, 4.86, 4.98, 5.1 (m, 2 H each complex signal, C<sub>5</sub>H<sub>4</sub>SiMe<sub>3</sub>), 6.95, 6.77, 6.91, 7.59 (m, C<sub>6</sub>H<sub>5</sub>). <sup>13</sup>C{H} NMR (125 MHz, C<sub>6</sub>D<sub>6</sub>):  $\delta$  0.5 (SiMe<sub>3</sub>), 97.3 (C<sup>1</sup>, C<sub>5</sub>H<sub>4</sub>SiMe<sub>3</sub>), 93.2, 97.5, 100.9, 103.4 (C<sup>2-5</sup>, exact assignment not possible, C<sub>5</sub>H<sub>4</sub>SiMe<sub>3</sub>), 124.8, 126.2, 134.0 (C<sub>6</sub>H<sub>5</sub>), 133.0 (d, <sup>2</sup>J<sub>C-P</sub> = 15.70 Hz, C<sub>6</sub>H<sub>5</sub>), 152.3 (d, <sup>1</sup>J<sub>C-P</sub> = 30.00 Hz, C<sub>6</sub>H<sub>5</sub>), 217.2 (CNXylyl). <sup>31</sup>P{<sup>1</sup>H} NMR (202 MHz, C<sub>6</sub>D<sub>6</sub>):  $\delta$  -0.3 (PPh<sub>2</sub>). Anal. Calcd for C<sub>37</sub>H<sub>45</sub>NNbPSi<sub>2</sub>: C, 62.08; H, 6.34; N, 1.96. Found: C, 61.85; H, 6.78; N, 2.15.

### Syntheses of 3 and 4

[Nb( $\eta^5$ -C<sub>5</sub>H<sub>4</sub>SiMe<sub>3</sub>)<sub>2</sub>(CNXylyl)(PPh<sub>2</sub>)] (**2**) (0.60 g, 0.75 mmol) in thf (30 mL) was treated with methyl propiolate (0.07 g,  $\rho$  = 0.94 gL<sup>-1</sup>, 0.75 mmol) at 0°C (ice bath) with vigorous stirring for 10 min. The thf solution was filtered and the solvent evaporated to dryness. Complex **3** was obtained as a deep-red solid after washing with hexane (5 mL) at 0 °C. Complex **4** was prepared using a similar method to complex **3** but using methyl butynoate.

(**3**) Yield = 85%. IR (Nujol):  $\nu$  (cm<sup>-1</sup>) 1718 (COO), 1630 (C=N), 1583 (C=C). <sup>1</sup>H NMR (500 MHz, C<sub>6</sub>D<sub>6</sub>):  $\delta$  0.22 (s, 18 H, SiMe<sub>3</sub>), 2.32 (s, 6 H, CH<sub>3</sub>, CNXylyl), 3.07 (s, 3H, C=CCO<sub>2</sub>CH<sub>3</sub>), 4.42 (m, 2 H complex signal, C<sub>5</sub>H<sub>4</sub>SiMe<sub>3</sub>), 4.74 (m, 4 H complex signal, C<sub>5</sub>H<sub>4</sub>SiMe<sub>3</sub>), 5.38 (m, 2 H complex signal, C<sub>5</sub>H<sub>4</sub>SiMe<sub>3</sub>), 6.91 (m, 9H, Ph), 7.52 (t, 4 H, <sup>3</sup>J<sub>HH</sub> = 8.06 Hz, PPh<sub>2</sub>); 7.62 (d, 1 H, <sup>2</sup>J<sub>HP</sub> = 2.44 Hz, HC=C). <sup>13</sup>C{H} NMR (125 MHz, C<sub>6</sub>D<sub>6</sub>):  $\delta$  0.4 (SiMe<sub>3</sub>), 20.0 (CH<sub>3</sub>, CNXylyl), 51.2 (C=CCO<sub>2</sub>CH<sub>3</sub>), 98.3 (C<sup>1</sup>), 87.1, 95.5, 98.2, 106.5 (C<sup>2-5</sup>, exact assignment not possible, C<sub>5</sub>H<sub>4</sub>SiMe<sub>3</sub>), 121.4–129.3 (C<sub>6</sub>H<sub>5</sub>), 131.5 (d, *Cortho* C<sub>6</sub>H<sub>5</sub>, <sup>2</sup>J<sub>CP</sub> = 9.95 Hz), 153.3 (*Cortho* CNXylyl), 141.0 (d, HC=C, <sup>1</sup>J<sub>CP</sub> = 28.73 Hz), 167.9 (d, C=CCO<sub>2</sub>CH<sub>3</sub>, <sup>2</sup>J<sub>CP</sub> = 28.36 Hz), 170.3 (d, C=CCO<sub>2</sub>CH<sub>3</sub>, <sup>3</sup>J<sub>CP</sub> = 23.57 Hz), 220.0 (C=N). <sup>31</sup>P{<sup>1</sup>H} NMR (202 MHz, C<sub>6</sub>D<sub>6</sub>):  $\delta$  84.1 (PPh<sub>2</sub>). Anal. Calcd for C<sub>41</sub>H<sub>49</sub>NNbO<sub>2</sub>PSi<sub>2</sub>: C, 64.13; H, 6.43; N, 1.82. Found: C, 64.00; H, 6.43; N, 1.85.

(**4**) Yield = 85%. IR (Nujol):  $\nu$  (cm<sup>-1</sup>) 1718 (COO), 1617 (C=N), 1588 (C=C). <sup>1</sup>H NMR (500 MHz, C<sub>6</sub>D<sub>6</sub>):  $\delta$  0.15 (s, 18 H, SiMe<sub>3</sub>), 1.91 (s, 3 H, CH<sub>3</sub>C=CCO<sub>2</sub>CH<sub>3</sub>), 2.33 (s, 6 H, CH<sub>3</sub>, CNXylyl), 3.02 (s, 3H, C=CCO<sub>2</sub>CH<sub>3</sub>), 4.59, 4.70, 4.79, 5.33 (m, 2 H each complex signal, C<sub>5</sub>H<sub>4</sub>SiMe<sub>3</sub>), 6.97 (m, 9H, Ph), 7.58 (t, 4 H, <sup>3</sup>J<sub>HH</sub> = 7.68 Hz, PPh<sub>2</sub>), 7.62 (d, 1 H, <sup>2</sup>J<sub>HP</sub> = 2.44 Hz, HC=C). <sup>13</sup>C{H} NMR (125 MHz, C<sub>6</sub>D<sub>6</sub>):  $\delta$  0.4 (SiMe<sub>3</sub>), 20.0 (CH<sub>3</sub>, CNXylyl), 30.0 (s, 3 H, CH<sub>3</sub>C=CCO<sub>2</sub>CH<sub>3</sub>), 51.27 (C=CCO<sub>2</sub>CH<sub>3</sub>), 98.4 (C<sup>1</sup>), 87.0, 95.6, 98.3, 106.5 (C<sup>2-5</sup>, exact assignment not possible, C<sub>5</sub>H<sub>4</sub>SiMe<sub>3</sub>), 121.5–128.4 (C<sub>6</sub>H<sub>5</sub>), 138.1 (d, *Cortho* C<sub>6</sub>H<sub>5</sub>, <sup>2</sup>J<sub>CP</sub> = 33.84 Hz), 153.3 (*Cortho* CNXylyl), 141.1 (d, CH<sub>3</sub>C=C, <sup>1</sup>J<sub>CP</sub> = 29.41 Hz), 167.9 (d, C=CCO<sub>2</sub>CH<sub>3</sub>, <sup>2</sup>J<sub>CP</sub> = 26.19 Hz), 170.3 (d, C=CCO<sub>2</sub>CH<sub>3</sub>, <sup>3</sup>J<sub>CP</sub> = 23.77 Hz), 219.9 (C=N). <sup>31</sup>P{<sup>1</sup>H} NMR (202 MHz, C<sub>6</sub>D<sub>6</sub>):  $\delta$  101.1 (PPh<sub>2</sub>). Anal. Calcd for C<sub>42</sub>H<sub>51</sub>NNbO<sub>2</sub>PSi<sub>2</sub>: C, 64.51; H, 6.57; N, 1.79. Found: C, 64.27; H, 6.24; N, 1.94.
